# Supplementary material for: Transplantation of Human Induced Pluripotent Stem Cell-Derived Retinal Pigment Epithelium in a Swine Model of Geographic Atrophy
Source: MDPI journal article supplement (doi:10.3390/ijms221910497), 2021-09-28
Supplement: s1 [file s1]

## SUPPLEMENTARY MATERIALS

### MATERIALS AND METHODS

#### *SparQ-GFP lentiviral production and hiPSC transduction*

HEK293T (human embryonic kidney 293T) cells were cultured in Dulbecco's modified Eagle's medium (DMEM) supplemented with 10% FBS (Hyclone), 1% Glutamax, 1% non-essential amino acids, 100 units/ml penicillin and 100 µg/ml streptomycin, at 37 °C under humidified air containing 5% CO<sub>2</sub>. Lentiviral particles were produced using a 2<sup>nd</sup> generation lentiviral system. Briefly, HEK293T cells were transfected with SparQ-GFP (System Biosciences), psPAX2 and pMD2.G (Addgene) at a ratio of 1:0.75:0.25 µg DNA ratio respectively, using Fugene 6 (Roche). After 16 h, medium was replaced with fresh medium. Virus-containing medium was collected after 24 h and 48 h and viral particles were concentrated by ultracentrifugation. The CBiPS30-4F-5 line was transduced with 1000-fold diluted SparQ-GFP viral particles in the presence of 10 µg/ml of polybrene in mTeSR1 medium. After 24 h, cells expressed GFP under the EF1 promoter and the medium was changed every other day. Cells were disaggregated and GFP+ clones were selected.

#### *Flow cytometry analysis*

hiPSC, hRPE and hRPE-GFP cell cultures were dissociated into single cells using TrypLE Select, neutralized and resuspended in cold PBS and filtered through a 30-µm filter to remove clusters and debris. hRPE-GFP single cells were sorted for GFP using the MoFlo® XDP cell sorter (Beckman Coulter). Viable cells were gated by their forward and side scatter characteristics, and gates were set to sort positive and negative cell populations. To test cell viability after passing through the cannula, hRPE-GFP+ cells were stained with propidium iodide (mg/mL) and analyzed by flow cytometry using a Gallios flow cytometer (Beckman Coulter) to measure cell apoptosis, which was compared with that of control cells. To assess hRPE-GFP cell culture purity, hiPSC and hRPE-GFP single cells were stained with the Live/Dead fixable Violet (Invitrogen) for 30 min following by 2 % PFA fixation. Cells were incubated with Alexa Fluor 647 Mouse Anti-Human TRA-1-60, PE Mouse Anti-Human CD140b, and PE Mouse Anti-Human CD59 diluted in 2% normal donkey serum (Thermo Fisher Scientific) for 30 min protected from the light at room temperature (antibodies are listed in Supplemental Table S1). Stained cells were analyzed using a LSR Fortessa Cell analyzer (BD Biosciences) equipped with 405, 488, 561, and 640 nm lasers. Flow cytometry analysis was performed by gating out death cells, doublets and the debris. Unstained cells and secondary antibodies were used as negative controls and hRPE cells were used as a negative control for GFP. Analysis of the data was carried out using the FCS Express software (BD Biosciences).

### *Karyotyping*

The hiPSC-GFP line was karyotyped to evaluate its genomic integrity. Karyotyping (Ambar, Barcelona) was performed on G-banded metaphase chromosomes following standard procedures. A minimum of 20 metaphases were examined.

### *Terminal dUTP Nick End Labeling (TUNEL) Staining*

Porcine eye cryosections (20–40 µm) were assayed by TUNEL staining of fragmented DNA using the In Situ Cell Death Detection Kit, TMR red (Roche) with some modifications. To amplify the fluorescent signal, retinal cryosections were incubated with a goat anti-rhodamine antibody overnight at 4°C followed by a Cy3-conjugated anti-goat IgG for 2 h at room temperature. Nuclei were stained with DAPI. Negative control reactions omitted the enzyme step in the reaction and positive controls were established by treating tissue sections with DNase I.

### *Preoperative preparation and medication*

Animals were premedicated with an intramuscular injection of atropine (0.04 mg/kg; B. Braun Medical S.A., Barcelona, Spain) in combination with dexmedetomidine (Dexmopet, 0.03 mg/kg; Fatro Ibérica S.L., Barcelona, Spain), midazolam (0.3mg/kg; Laboratorios Normon S.A., Madrid, Spain) and butorfanol (Alvegesic, 0.3 mg/kg; Dechra S.L., Barcelona, Spain). Prior to surgery, animals were anesthetized through intravenous injection of propofol (Propovet multidosis, 0.5–1mg/kg; Zoetis S.L., Madrid, Spain), and were endotracheally intubated to maintain general anesthesia with isoflurane (Isoflo; Zoetis S.L.) with a minimal alveolar concentration of 2–4% and 100% oxygen. Additionally, the pigs received a complementary medication of anti-inflammatory (meloxicam 0.4 mg/kg; Metacam; Boehringer Ingelheim Vetmedica GmbH S.A., Ingelheim/Rhein, Germany) and antibiotic enrofloxacin (Baytril, 2.5 mg/kg; Bayer Hispania S.L., Barcelona, Spain) treatments through intramuscular injections. Both pupils were dilated with 2–3 drops of phenylephrine (Colicursí phenylephrine, Novartis Farmacéutica S.A., Barcelona, Spain) and tropicamide (Colicursí tropicamida, Novartis Farmacéutica S.A.) at 100 mg/ml. After surgery, the isoflurane dose was reduced and animals were extubated when breathing reflex was detected. Topical administration of an anti-inflammatory and antibiotic ointment (chloramphenicol, 0.5 mg/g and dexamethasone, 10 mg/g) was applied on the study eyes after surgery and twice a day during 10 days. Euthanasia was carried out under sedation and applying an intravenous sodium pentobarbital overdose at 80 mg/kg.

## SUPPLEMENTARY TABLES

**Table S1.** Antibodies used for immunochemical analyses.

| <b>Name</b>                               | <b>Comercial house and reference</b> | <b>Dilution</b> |
|-------------------------------------------|--------------------------------------|-----------------|
| Alexa Fluor 647 Mouse Anti-Human TRA-1-60 | BD Biosciences, 560850               | 0.5 µl          |
| Bestrophin-1                              | Santa Cruz Biotechnology, sc-32792   | 1:25            |
| GFAP                                      | Dako, Z0334                          | 1:500           |
| Ku80                                      | Cell Signaling, 2180                 | 1:200           |
| MITF                                      | Santa Cruz Biotechnology, sc-56725   | 1:25            |
| NANOG                                     | R&D Systems, AF1997                  | 1:25            |
| OCT4                                      | Santa Cruz, sc-5279                  | 1:25            |
| OTX2                                      | Santa Cruz Biotechnology, sc-30659   | 1:25            |
| PAX6                                      | Covance, PRB278P                     | 1:100           |
| PE-conjugated CD140b                      | BD Biosciences, 558821               | 2 µl            |
| PE-conjugated CD59                        | BD Biosciences, 560953               | 2 µl            |
| PKC-alpha (H-7)                           | Santa Cruz, sc-8393                  | 1:50            |
| Recoverin                                 | Millipore, AB5585                    | 1:500           |
| Rhodopsin                                 | Sigma, O4886                         | 1:500           |
| RPE65                                     | Novus Biologicals, NB100-355         | 1:100           |
| SOX2                                      | ABR, PA1-16968                       | 1:100           |
| SSEA4                                     | Hybridoma Bank, MC-813-70            | 1:2             |
| TRA-1-60                                  | Millipore, MAB4360                   | 1:100           |
| ZO1                                       | Millipore, AB2272                    | 1:100           |

**Table S2.** Primer sequences used for qRT-PCR analysis.

| <b>Gene</b> | <b>Forward</b>           | <b>Reverse</b>           |
|-------------|--------------------------|--------------------------|
| CRALBP      | CCTCTCCTCAACTGTCCTG      | CCCTCCTTTATTACCCATCCC    |
| GAPDH       | GTCAGTGGTGGACCTGACCT     | AGGGGAGATTCAGTGTGGTG     |
| OCT3/4      | GTTCTTCATTCACTAAGGAAGG   | CAAGAGCATCATTGAACTTCAC   |
| OTX2        | GACCACTTCGGGTATGGACT     | TGGACAAGGGATCTGACAGT     |
| PEDF        | AGATCTCAGCTGCAAGATTGCCCA | ATGAATGAACTCGGAGGTGAGGCT |
| SIL         | GTTGATGGCTGTGGTCCTTG     | CAGTGACTGCTGCTATGTGG     |
| TYR         | ACTTACTCAGCCCAGCATC      | GGTTTCCAGGATTACGCC       |

## FIGURES

### FIGURE S1

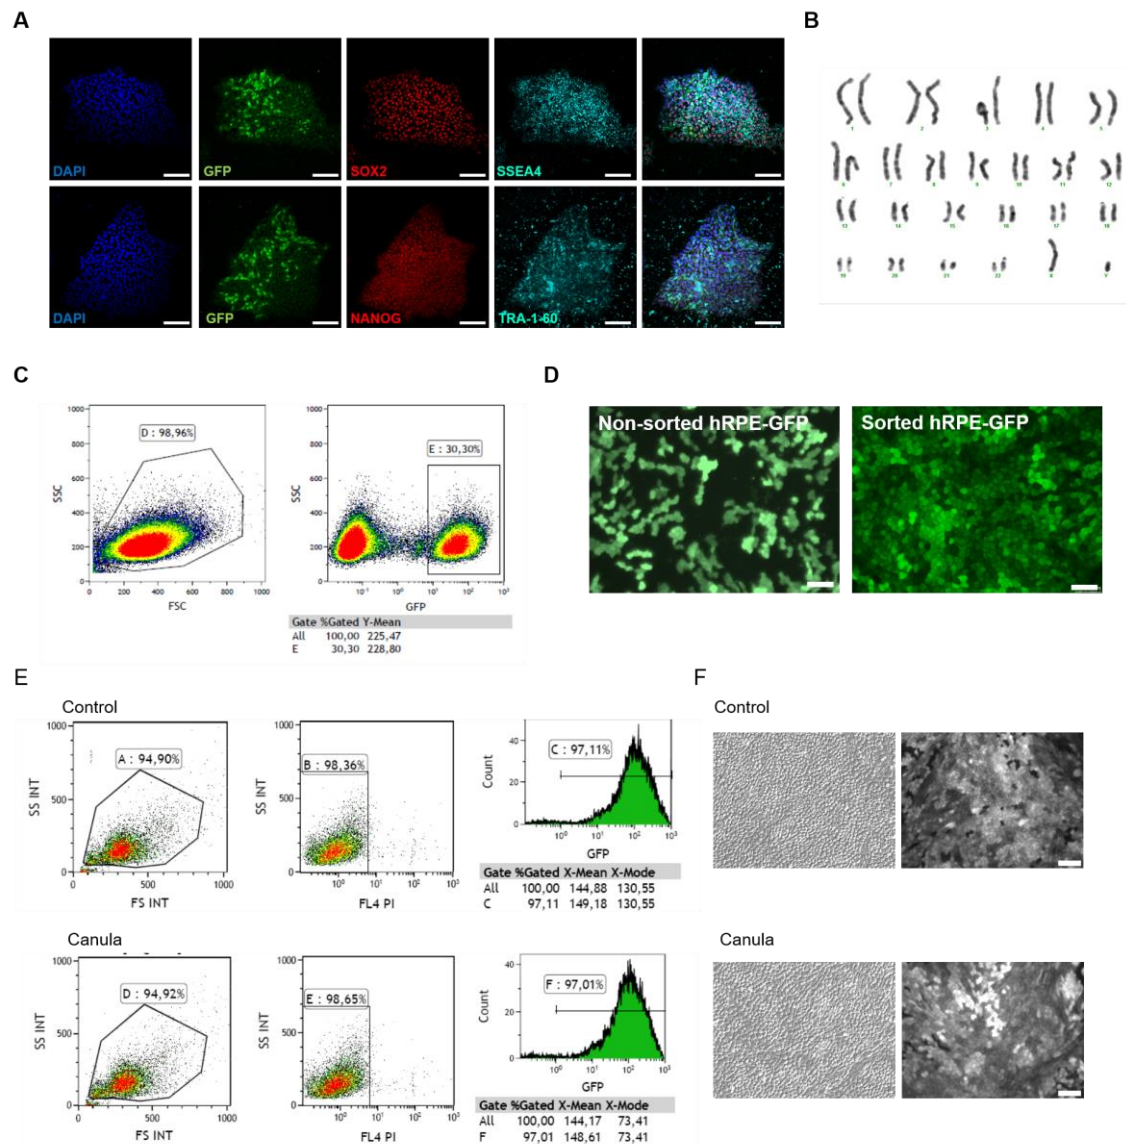

**Figure S1: Characterization of CBiPS30-4F-5 human stem cell line-derived retinal pigment epithelial cells (RPE) expressing GFP.** (A,B) Characterization of the transduced CBiPS30-4F-5-GFP clone. (A) hiPSC colonies expressed pluripotency markers SOX2, SSEA4, NANOG and TRA-1-60 (scale bars: 100  $\mu$ m) and (B) maintained normal 46, XY karyotype. (C,D) Fluorescence-activated cell sorting of differentiated hiPSC-RPE-GFP cells in culture. (C) Forward *versus* side scatter plot of hiPSC-RPE cell population shows an homogeneous distribution, and side scatter *versus* GFP fluorescence intensity (in abscissas) shows the population considered positive (highlighted in a square). (D) hiPSC-RPE cells in culture before and after cell sorting. Scale bar: 75  $\mu$ m. (E,F) Viability test of hiPSC-RPE cells after passing through the subretinal injection cannula (diameter 23/38G). (E) Flow cytometry quantitative analysis plots of side scatter intensity *versus* propidium iodide show excellent cell viability rate (98.65%) similar noninjected cells (98.36%). (F) After passing through the cannula, hiPSC-RPE cells were not damaged and remained viable after 10 days in culture. Scale bar: 75  $\mu$ m. Similar results were obtained using a 25/41G subretinal injection cannula (not shown).

**FIGURE S2**

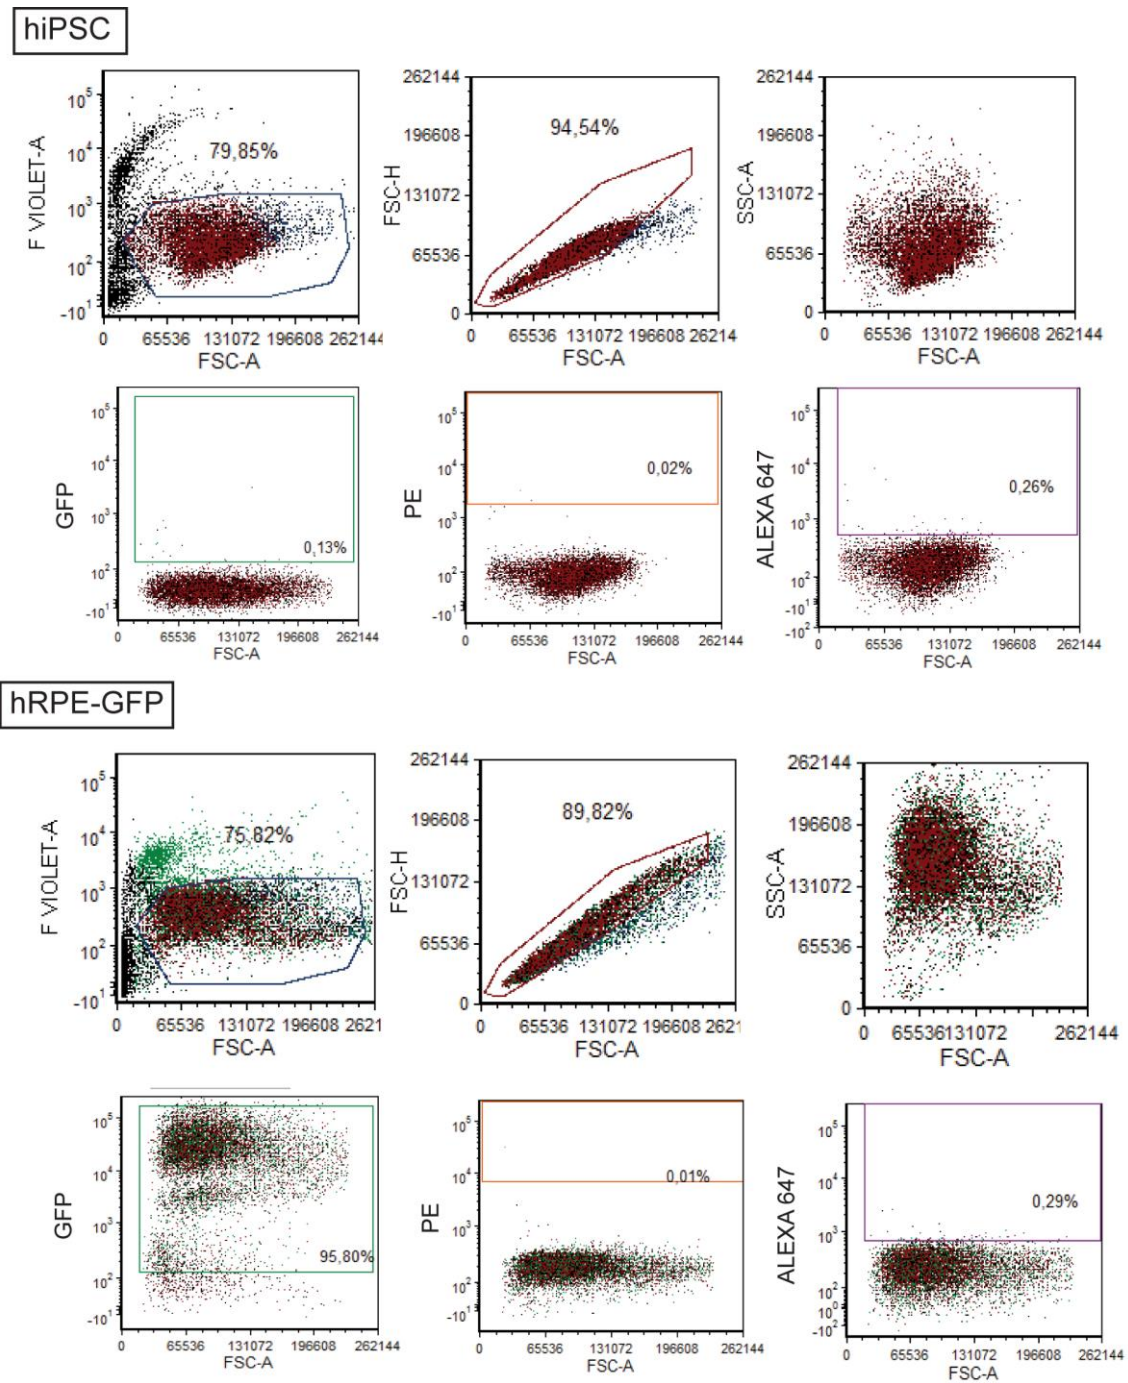

**Figure S2: Flow cytometry strategy.** Dot plot showing flow cytometry strategy indicating the live cells, dead cells, doublets and debris in hiPSC and hRPE-GFP cells. Unstained cells and specific isotype were used as negative controls.

**FIGURE S3**

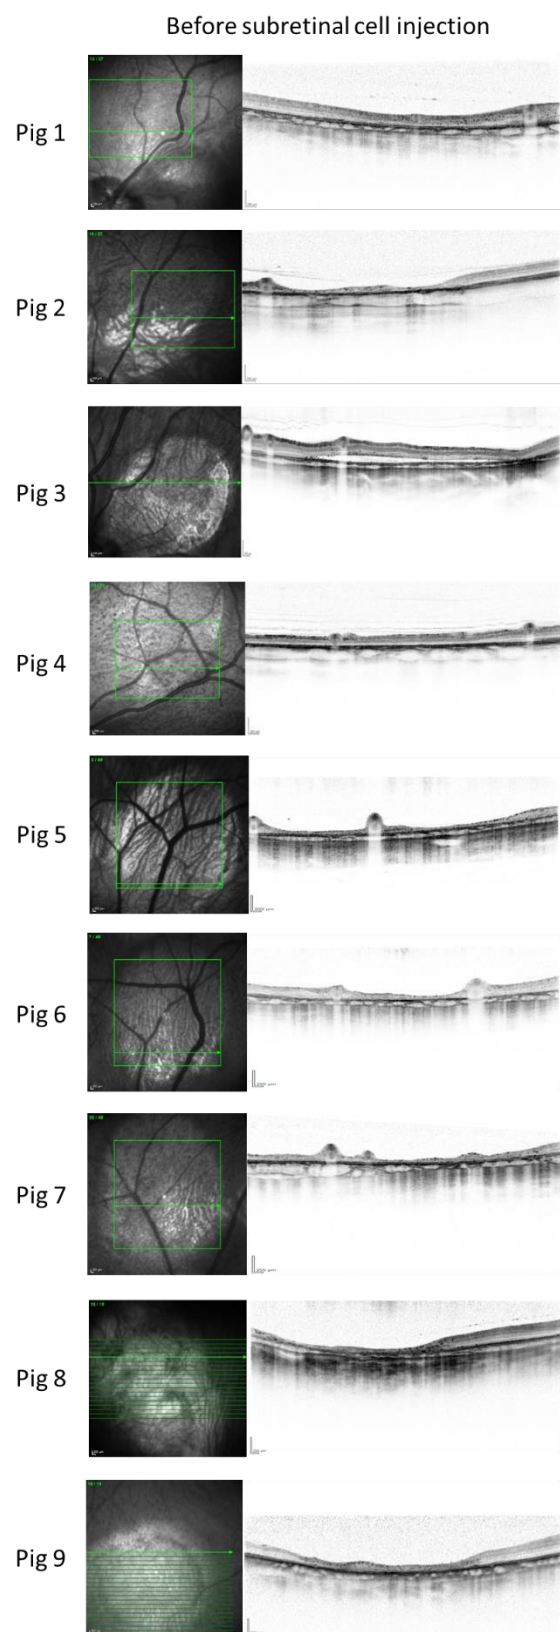

**Figure S3: In vivo visualization of retinal atrophy lesions.** SD-OCT guided by infrared fundus of all eyes at day 30 just before hiPSC-RPE subretinal cell injection, showing different degrees of selective outer retinal atrophy.



**A**

Normal      Border      Atrophy

GFAP RHO      GFAP RHO      GFAP RHO

GCL  
INL  
ONL  
RPE

GFAP      GFAP      GFAP

**B**

GFP GFAP RHO

GCL  
INL  
ONL  
RPE

GFP Ku80

GCL  
INL  
ONL

**C**

BEST1      RPE65

GFP

MERGE

COLocalized  
PIXEL MAP

Intensity

Relative distance

Legend: GFP (green), RPE65 (red)

8
